# Supplementary material for: Transcriptional profiling to identify the key genes and pathways of pterygium
Source: PeerJ. 2020 May 4;8:e9056. doi: 10.7717/peerj.9056 (PMC7204871; doi:10.7717/peerj.9056)
Supplement: Supplemental Information 1 [file peerj-08-9056-s005.xlsx]

## Sheet: Sheet1
		GAPDH		CXCL12		ECM1		FN1		GADD34		IQGAP2
Sample	Sample ID	Replicate 1	Replicate 1	Replicate 1	Replicate 1	Replicate 1	Replicate 1	Replicate 1	Replicate 1	Replicate 1	Replicate 1	Replicate 1	Replicate 1
pteygium	1	17.89	17.87	29.48	29.47	32.48	31.77	29.19	29.56	20.46	20.1	29.29	29.09
	2	17.87	17.64	30.92	30.67	32.4	32.9	30.48	30.94	20.26	20.08	29.95	30.41
	3	17.89	17.9	28.17	28.29	35.65	32.52	28.3	28.51	20.2	19.35	28.3	28.08
	4	17.61	17.92	27.75	27.45	32.51	32.2	27.78	27.3	19.95	20.25	29.38	29.67
	5	17.61	17.6	28.95	29.02	34.56	35.56	28.93	29.2	20	18.86	29.07	28.98
	1li	17.79	17.7	29.01	28.15	30.82	31.06	28.57	28.64	18.23	15.85	28.71	28.02
	2zhou	17.84	17.8	29.33	29	31.86	32.31	29.09	29.1	20.4	20.07	28.05	28
	3xu	17.79	17.77	28.29	28.17	32.61	32.77	29.43	29.22	19.54	19.48	28.22	28.2
	4feng	17.68	17.58	29.28	29.56	32.37	32.41	29.31	29.74	20.18	20.07	28.32	28.38
	5yang	17.51	17.81	30.86	31.08	33.57	33.77	31.92	31.67	20.23	20.07	30.27	30.62
Normal control	N1	17.65	17.65	29.51	28.79	35.7	35.72	28.25	28.19	19.85	20.62	28.35	28.18
	N2	17.61	17.65	28.78	29.13	30.14	30.47	29.33	29.67	19.82	19.83	29.13	29.21
	N3	17.88	17.64	28.61	28.82	28	28.17	28.16	28.49	21.95	22.08	28.18	28.01
	N4	17.67	18.05	28.78	28.78	31.27	30.98	29.51	29.55	21.45	20.96	28.33	28.45
	N5	17.59	17.62	28.31	29.5	29.54	29.91	28.93	28.68	23.16	22.08	29.35	29.26
	N6	17.64	18.01	26.7	26.63	27.6	27.57	29.05	28.82	23.13	23.03	28.62	28.08
	N7	17.95	17.9	28.15	28.44	29.18	29.31	29.02	29.11	21.91	20.99	28.26	28.87
	N8	17.98	17.94	28.43	28.53	28.03	28.19	28.28	28.2	21.26	20.94	27.5	27.6
	N9	17.68	17.97	29.37	29.56	29.53	29.23	28.68	28.92	20.65	20.9	28.54	28.44
	N10	17.67	17.65	30.86	31.12	29.6	29.6	30.59	30.7	23.36	23	29.94	30.08

## Sheet: Sheet2
		GAPDH			BAB1			BAB2			LCN1			LTF			SCGB2A1
Sample	Sample ID	Replicate 1	Replicate 2	Replicate 3	Replicate 1	Replicate 2	Replicate 3	Replicate 1	Replicate 2	Replicate 3	Replicate 1	Replicate 2	Replicate 3	Replicate 1	Replicate 2	Replicate 3	Replicate 1	Replicate 2	Replicate 3
pteygium	1	29.1165	28.4332	28.3157	22.1212	22.4139	22.7361	23.1964	22.1414	22.5134	29.2762	29.4586	29.4592	30.2361	31.2063	30.3427	28.9589	28.331	29.0582
	2	29.725	28.4513	29.2831	17.309	17.6566	17.7471	17.8364	17.4053	17.7241	28.8379	29.2266	29.5324	29.1948	30.5292	30.0033	28.4851	28.7786	28.579
	3	30.6728	29.7098	29.2238	22.4835	22.6806	22.7713	22.7592	22.5149	22.7454	29.5614	29.6268	29.561	30.2534	30.4462	29.8533	28.8219	29.2946	29.0626
	4	29.4631	28.1746	29.1927	18.2498	18.5161	18.3427	18.042	18.9954	18.2181	28.9612	28.9116	29.6287	30.7343	29.8582	30.5207	28.4973	28.7023	29.5269
	5	29.4853	28.8235	29.0279	17.5006	17.5158	17.5045	17.6164	17.3503	17.2895	29.041	29.1704	29.7983	30.5053	30.3934	30.5843	28.4303	28.7884	29.2663
	6	29.8254	29.1557	29.2099	21.0355	21.3446	21.2905	20.9375	20.881	20.7923	29.0036	29.9414	29.9816	30.4343	28.9655	30.2301	29.3418	29.0654	29.2355
	7	30.2138	29.6204	29.0717	20.1057	20.1323	20.0385	20.1914	19.8937	19.9373	29.3614	29.7886	29.7729	30.9108	30.7325	30.6802	28.548	28.746	29.4923
	8	30.5577	30.0798	29.5418	20.1336	20.2467	20.3601	20.1229	20.0089	20.1724	29.2314	29.9002	28.5766	30.63	29.3762	30.4417	28.728	28.791	29.0211
	9	32.712	30.9972	31.0633	18.4896	18.0705	17.9136	18.1051	17.8818	18.0205	29.9031	29.9499	29.8837	30.9418	30.6405	30.5408	28.7966	28.6495	29.2752
	10	29.573	29.1439	29.6704	17.8486	18.2585	17.663	18.064	17.9516	17.9131	29.4551	29.7258	29.2694	31.1161	30.5045	30.8529	28.6792	28.9242	29.3017
	11	24.6291	23.6961	24.4568	21.9398	22.2096	21.519	22.2381	21.4401	21.5307	29.5684	29.7071	29.0086	30.499	30.8273	30.595	28.8584	28.3821	29.4676
	12	28.3861	27.3171	27.6287	18.688	18.9825	18.9992	18.459	18.4073	18.4653	28.9757	29.8518	29.5517	29.764	28.1743	31.2494	28.5483	28.6344	29.0405
Normal control	N1	33.1297	31.8016	31.4812	24.1781	24.9378	24.7943	24.4775	24.8651	24.4262	27.248	27.5676	27.65	30.3742	30.2304	29.1065	28.2113	28.1952	29.0019
	N2	31.4774	29.6691	29.3262	23.2526	23.9575	23.6278	23.2647	23.3495	23.4789	27.3005	27.7593	27.7645	29.6305	30.2256	30.4123	28.0629	29.0868	28.6705
	N3	33.2589	31.8374	32.4939	21.2829	21.9586	22.0129	22.1539	21.8648	21.9676	27.4141	27.8561	27.8207	35.4128	29.8494	30.9908	28.031	28.4833	29.115
	N4	32.5917	31.1592	31.0237	25.8234	26.1433	26.4121	25.7438	25.6445	25.6516	27.2632	27.7737	27.7049	30.4579	30.0137	30.3796	28.1564	28.5589	28.9754
	N5	32.0012	30.3751	29.9433	23.2044	23.5556	23.8805	23.2735	23.3116	23.3057	27.0625	27.6326	27.6337	30.5796	30.2195	30.1981	28.4376	28.1307	28.2611
	N6	30.2166	28.7238	28.9808	21.5813	22.2701	22.3426	22.6449	21.8319	22.0574	27.1438	27.6368	27.7323	30.1857	30.5383	30.1311	27.8457	28.1887	29.054
	N7	30.2166	28.7238	28.9808	23.0553	23.2092	23.3829	23.0667	22.913	22.87	27.2651	27.5716	27.7106	30.8455	30.292	30.4265	27.9651	28.1957	28.5939
	N8	28.8449	27.249	27.268	26.5539	26.6663	26.5456	27.1015	26.6982	26.4057	27.2685	27.4448	27.4766	29.2415	30.3093	30.2111	27.864	28.3993	28.6823
	N9	30.3908	29.4082	29.1741	25.4424	25.8498	25.7531	25.7065	25.3899	25.3863	27.1136	27.4944	27.458	30.3423	30.4615	29.429	28.0954	28.5504	28.7624
	N10	31.5391	30.2101	29.7807	29.7138	30.1227	29.462	30.2363	29.1769	29.1169	26.987	27.5861	27.3995	30.7982	30.3258	30.0868	27.9292	28.3244	28.8669
	N11	31.7999	31.4271	31.1056	30.6083	30.055	31.5819	30.8883	30.6315	30.787	27.9475	27.5204	27.3937	29.4613	30.4878	30.0259	28.2002	28.124	28.8879
	N12	29.6781	29.251	29.5134	28.9289	30.0033	29.4257	29.5131	29.3654	29.4827	26.8424	27.6557	27.7496	30.3466	30.1948	30.4242	28.0205	28.293	28.7564
