# Supplementary material for: Transcriptional profiling to identify the key genes and pathways of pterygium
Source: PeerJ. 2020 May 4;8:e9056. doi: 10.7717/peerj.9056 (PMC7204871; doi:10.7717/peerj.9056)
Supplement: Supplemental Information 6 [file peerj-08-9056-s006.xlsx]

## Sheet: Sheet1
		GAPDH		CXCL12		ECM1		FN1		GADD34		IQGAP2
Sample	Sample ID	Replicate 1	Replicate 2	Replicate 1	Replicate 2	Replicate 1	Replicate 2	Replicate 1	Replicate 2	Replicate 1	Replicate 2	Replicate 1	Replicate 2
pteygium	1	17.89	17.87	29.48	29.47	32.48	31.77	29.19	29.56	20.46	20.1	29.29	29.09
	2	17.87	17.64	30.92	30.67	32.4	32.9	30.48	30.94	20.26	20.08	29.95	30.41
	3	17.89	17.9	28.17	28.29	35.65	32.52	28.3	28.51	20.2	19.35	28.3	28.08
	4	17.61	17.92	27.75	27.45	32.51	32.2	27.78	27.3	19.95	20.25	29.38	29.67
	5	17.61	17.6	28.95	29.02	34.56	35.56	28.93	29.2	20	18.86	29.07	28.98
	1li	17.79	17.7	29.01	28.15	30.82	31.06	28.57	28.64	18.23	15.85	28.71	28.02
	2zhou	17.84	17.8	29.33	29	31.86	32.31	29.09	29.1	20.4	20.07	28.05	28
	3xu	17.79	17.77	28.29	28.17	32.61	32.77	29.43	29.22	19.54	19.48	28.22	28.2
	4feng	17.68	17.58	29.28	29.56	32.37	32.41	29.31	29.74	20.18	20.07	28.32	28.38
	5yang	17.51	17.81	30.86	31.08	33.57	33.77	31.92	31.67	20.23	20.07	30.27	30.62
Normal control	N1	17.65	17.65	29.51	28.79	35.7	35.72	28.25	28.19	19.85	20.62	28.35	28.18
	N2	17.61	17.65	28.78	29.13	30.14	30.47	29.33	29.67	19.82	19.83	29.13	29.21
	N3	17.88	17.64	28.61	28.82	28	28.17	28.16	28.49	21.95	22.08	28.18	28.01
	N4	17.67	18.05	28.78	28.78	31.27	30.98	29.51	29.55	21.45	20.96	28.33	28.45
	N5	17.59	17.62	28.31	29.5	29.54	29.91	28.93	28.68	23.16	22.08	29.35	29.26
	N6	17.64	18.01	26.7	26.63	27.6	27.57	29.05	28.82	23.13	23.03	28.62	28.08
	N7	17.95	17.9	28.15	28.44	29.18	29.31	29.02	29.11	21.91	20.99	28.26	28.87
	N8	17.98	17.94	28.43	28.53	28.03	28.19	28.28	28.2	21.26	20.94	27.5	27.6
	N9	17.68	17.97	29.37	29.56	29.53	29.23	28.68	28.92	20.65	20.9	28.54	28.44
	N10	17.67	17.65	30.86	31.12	29.6	29.6	30.59	30.7	23.36	23	29.94	30.08
